# Supplementary material for: Impact of 30 years precipitation regime differences on forest soil physiology and microbial assemblages
Source: Frontiers journal article supplement (doi:10.3389/ffgc.2023.1142979), 2023-06-13
Supplement: Table_1.XLSX [file Table_1.XLSX]

## Sheet: Soil metabolites
Retention Time (RT)	Analyte number		PS_01	PS_02	PS_03	PS_04	PS_05	PS_06	LS_01	LS_02	LS_03	LS_04	LS_05	LS_06	LS_07	LS_08	LS_09
		Weight (mg)	500	500	500	500	500	500	500	500	500	500	500	500	500	500	500
Standard		**IS-nor-Valine	0.102764	0.0937031	0.0775361	0.0550228	0.0581831	0.0499636	0.133272	0.5134	0.146333	0.490596	0.26916	0.233363	0.497563	0.652393	0.810349
Standard		**IS-Adonitol	0.943752	0.90465	0.904814	0.904486	0.886682	0.882457	0.877963	0.950209	0.869112	0.92885	0.899766	0.911411	0.9081	0.938615	0.895736
Standard		**IS_1Br_C20	0.421266	0.41634	0.400459	0.381709	0.398743	0.397249	0.295238	0.451982	0.327213	0.372736	0.332449	0.377762	0.45516	0.556601	0.398043
2107.44	1	1-Monopalmitine	0.220895	0.74869	0.518825	0.410084	0.48025	0.430038	0.334109	0.181766	0.153146	0.175909	0.20481	0	0.477982	0.600983	0.118179
2215.5	2	1-Monostearine	0.432632	0.438031	0.552834	0	0.696811	0.480335	0	0	0.109975	0	0	0.417441	0.37843	0.54988	0
1957.41	3	18-Methyl-nonadecanol, trimethylsilyl ether	0.225079	0.36797	0.47342	0.307279	0.341243	0.348017	0.153305	0.13262	0.138368	0.0886015	0.168247	0.233031	0.133478	0.240542	0.156519
796.22	4	3-hydroxybutyric acid	4.21176	3.26601	2.42966	2.59165	2.36413	4.8381	0.961096	1.67299	1.48933	0.756549	1.40121	0.605181	0.934173	0.459533	0.40882
1264.6	5	4-Hydroxybenzoic acid	0	0	0	0	0	0.133594	0	0	0.0437225	0	0	0	0.107028	0	0
1597.89	6	4-hydroxycinnamic acid or 4-hydroxycoumaric acid	0	0	0	0.185311	0	0.167612	0.0581684	0.324435	0	0.333543	0.110623	0	0.823895	4.7628	0.594272
1210.51	7	6-Hydroxynicotinic acid	0	0	0	0	0	0	0	0	0	0	0	0	0	0	0
2017.88	8	Abietic Acid	0.135775	1.39042	0.244258	0.200757	0.409802	0.27808	0.0533177	0.213442	0	0	0	0	0.154206	0.292715	0.210709
1969.64	9	Arachidonic acid	0	0.207719	0.143635	0.129844	0.207759	0.137119	0.0809171	0	0	0	0.0899476	0	0	0.146761	0
1432.68	10	Azelaic acid	0	0	0	0	0	0	0	0	0.167922	0	0	0	0	0	0
2552.89	11	B-Sitosterol	5.32832	5.05771	5.13811	5.16461	5.49085	6.00382	2.65018	3.89064	3.20781	1.79343	3.6203	6.21228	3.86511	18.7766	5.64916
901.53	12	Benzoic acid	0.706441	0.585932	0.740743	0.473218	0.28234	0.579489	0.300615	0.115631	0.609978	0.302337	0.277605	0	3.32498	0.156811	0.119447
1288.49	13	C12 FA	0	0.0964107	0.152762	0.0931127	0.0869905	0.112578	0.172157	0.237854	0.16342	0.129939	0.165374	0	0	0	0
1357.54	14	C13 FA	0	0	0	0	0	0	0	0	0	0	0	0	0	0	0
1492.63	15	C14 FA	0.509167	0.40861	0.516312	0.413707	0.351334	0.437829	0.279887	0.395976	0.266944	0.173863	0.136506	0	0.307466	0.896121	0.328967
1453.59	16	C14 FA branched	0	0	0	0	0	0	0	0	0	0	0	0	0	0	0
1561.64	17	C15 FA branched_a	0.919089	0.958168	0.978033	0.730021	0.717286	0.694397	0.145397	0.364732	0.187458	0	0.127105	0	0.300422	0.395383	0.124986
1570.64	18	C15 FA branched_b	0.516427	0.993466	0.589847	0.64195	0.536997	0.512254	0.094474	0.444614	0	0	0	0	0.245133	0.203826	0
1603.61	19	C15 FA branched_c	0	0.407702	0.310391	0.262614	0.257395	0.262031	0.147762	0	0.105467	0	0.0951229	0	0.292961	0	0
1702.56	20	C16 FA	6.02014	9.35458	10.6835	7.77744	8.8385	9.05813	2.63047	3.21033	2.6034	1.61272	2.52103	2.76943	2.25699	3.74343	1.67062
1666.56	21	C16 FA branched	0.785337	1.09059	0.790997	0.875691	0.710386	0.632125	0.136199	0.297943	0.301228	0	0.248969	0	0.159436	0.202964	0
2038.53	22	C16 di-carboxylic acid	0	0	0.155799	0.210711	0.0929476	0.123504	0	0	0	0	0	0	0	0	0
1675.62	23	C16= FA_a	0	0	0	0	0	0	0	0	0	0	0	0	0	0	0
1684.62	24	C16= FA_b	1.88886	3.2998	2.48185	1.70136	1.93209	1.9638	0.696126	0.976865	0.984169	0.490142	0.942377	0.90436	0.438253	0.741991	0.436046
1693.62	25	C16= FA_c	1.54166	2.5362	2.92104	2.74465	3.33207	2.35396	0.841639	0.570375	0.382463	0.247178	0.235836	0.463142	0.523031	0.837696	0.282218
1741.52	26	C17 FA branched_a	0.766574	1.19922	1.16017	0.861242	0.971868	0.846283	0.266665	0.512729	0.295335	0.116178	0.301754	0.222147	0	0	0
1747.56	27	C17 FA branched_b	0	0	0	0	0	0	0	0	0	0	0	0	0	0	0
1762.52	28	C17 FA branched_c	0.246652	0.305414	0.224418	0.204954	0.328513	0.222371	0	0.28553	0.0769856	0	0.0376088	0	0	0.296288	0
1768.52	29	C17 FA branched_d	0.246652	0.544814	0.407245	0.320533	0.328513	0.222371	0	0.28553	0.0769856	0	0.10698	0	0	0.276099	0.0892521
1771.51	30	C17 FA branched_e	0	0.544814	0.407245	0.320533	0.328513	0.321435	0	0.28553	0	0	0.10698	0	0	0.276099	0.0892521
1795.5	31	C17 acid	0.394417	0.443721	0.470183	0.329212	0.362762	0.443865	0.0566286	0.10696	0.120115	0	0.0949225	0	0.137419	0.195362	0
1783.56	32	C17= FA	0.579717	0.595112	0.58147	0.412173	0.432946	0.449965	0	0.0784879	0	0	0.0544844	0	0.116184	0.193691	0.0871173
1876.49	33	C18 FA	1.51883	2.09713	2.58775	2.12104	2.44441	3.12646	0.808879	1.67336	1.54112	1.23326	1.82562	1.34755	1.34	2.5967	0.962599
1804.43	34	C18 OH	0	0	0	0.126524	0	0	0.0491616	0	0	0	0.0489639	0	0	0.127679	0
1825.5	35	C18 acid branched	0.343649	0.510217	0.348144	0.345114	0.433677	0.305759	0.0429231	0.137423	0	0	0	0	0	0	0
1855.55	36	C18= FA_a	7.33807	13.7858	13.4308	8.16712	11.3214	11.5757	2.57253	4.65934	3.36435	1.47648	2.919	3.24229	1.65911	8.17927	2.17578
1861.54	37	C18= FA_b	1.63594	2.27496	2.91504	1.7484	1.70295	1.9916	0.326674	1.01983	0.425696	0.379461	0.434264	0.553997	0.769323	1.23779	0.526154
1852.58	38	C18== FA	1.60314	0	2.80985	0.879906	0	0	0	0	0	0	0	0	0	0	0
1834.64	39	C18=== FA	0	0.664027	0.37056	0.0996105	0.138573	0.282844	0	0	0.120178	0	0	0	0	0	0
1846.46	40	C18=? FA	0	0.34088	0.279926	0	0.243914	0	0	0	0	0	0	0	0	0	0
1942.52	41	C19= FA	1.33774	1.76192	1.4804	1.25324	1.24647	1.40836	0.208323	0.61125	0.215537	0.14903	0.285047	0	0.488	0.585164	0.214055
1879.5	42	C19= FA branched_a	0.307392	0.356784	0.41534	0.376949	0	0.181822	0	0	0	0	0	0	0	0	0
1903.48	43	C19= FA branched_b	0.477446	0.684746	0.684995	0.71269	0.556377	0.628647	0.0826461	0.273945	0.157547	0	0	0	0	0.208649	0
2017.48	44	C20 FA	0.835916	0.903853	0.804125	0.747622	0.878622	0.75803	0.338322	0.409666	0.354982	0.238365	0.369259	0.591487	0.563859	0.653434	0.284804
1999.53	45	C20 FA branched	0	0	0.26911	0	0	0.198611	0	0	0	0	0	0	0	0	0
2080.49	46	C21 FA	0.328889	0.64881	0.496265	0.392418	0.324282	0.535221	0.12477	0.115234	0.0973131	0.105038	0.113236	0.387379	0.213309	0.298951	0.15145
2140.51	47	C22 FA	2.63948	2.50371	2.50503	2.75363	2.39551	2.9353	1.18959	1.10526	1.0886	0.654224	1.05905	2.34677	1.40416	2.25564	0.920255
2086.45	48	C22 OH	1.68656	1.65423	2.80822	2.76112	0.352705	2.04034	0.0587564	0.456665	0	0	0.273981	0	0.359623	0	0
2362.85	49	C22 di-acid	0.647156	0.843501	0.928759	1.02642	0.799022	1.26918	0.268104	0	0.237323	0.064188	0	0	0.254889	0.146591	0
2236.59	50	C23 FA	0	0.0603978	0.136655	0.0719359	0.121727	0.134086	0	0	0	0	0	0	0	0	0
2143.44	51	C23 OH	0.263481	0.207975	0.276243	0.27429	0.215657	0.273268	0	0	0	0	0	0	0	0	0
2474.24	52	C24 Di-Acid-like terpene	0.654061	0.522106	0.775858	0.884417	0.645443	0.982184	0.153532	0	0.173642	0	0	0	0	0	0
2245.56	53	C24 FA branched	3.62927	3.28883	3.50516	3.7544	3.45771	4.16429	1.34877	1.54797	1.45687	0.941219	1.50594	2.58027	1.82262	2.28802	1.11635
2540.28	54	C24 FA-monoglyceride	0	0.246811	0.24114	0	0	0.218881	0	0.115054	0	0	0	0	0	0	0
2197.46	55	C24 OH	1.58373	1.33866	1.48622	1.71164	1.31134	1.6811	0.337652	0.297248	0.373045	0.222424	0.309445	0.676931	0.547167	0.740337	0.194319
2480.65	56	C24 di-acid	0	1.228	0.46129	0	1.09888	1.28464	0	0	0	0	0.55895	0	0	3.38238	1.01049
2296.62	57	C25 FA	1.03026	0.823822	0.970054	0.9436	0.853032	1.00824	0.376918	0.429479	0.308979	0.194098	0.296775	0.321808	0.304291	0.400772	0.19543
2251.49	58	C25 OH	0	0.197253	0.119713	0.138365	0.115069	0.103233	0.0865254	0	0	0	0	0	0	0.144436	0
2347.75	59	C26 FA	2.55668	1.9446	2.5216	2.37146	2.46355	2.53254	0.81345	1.01216	0.808316	0.435803	0.642082	0.889378	0.552445	0.813681	0.419094
2299.56	60	C26 OH	3.32109	2.29581	3.20707	2.83345	2.58181	3.04595	1.13122	1.25712	1.06869	0.89372	0.823246	0.923572	0.889416	1.38557	0.731761
2398.9	61	C27 FA	0.513612	0.451853	0.51597	0.552097	0.469534	0.69054	0.168082	0.2244	0.118142	0.151785	0.145907	0	0	0	0
2350.67	62	C27 OH	0	0	0	0	0	0	0	0	0	0	0	0	0	0	0
2459.09	63	C28 FA	1.50912	1.26845	1.28403	1.4244	1.49551	1.39832	0.632307	0.695375	0.499945	0.385519	0.669821	0.583434	0.288575	0.460096	0.369224
2401.81	64	C28 OH	0.566122	0.495051	0.667274	0.529813	0.580395	0.634413	0.344254	0.567584	0.349847	0.277834	0.268213	0	0	0.394189	0.199746
2522.33	65	C29 FA	0.249615	0.260106	0.215334	0.250727	0.154284	0.359525	0.0468466	0	0	0	0.153859	0	0	0	0
2597.6	66	C30 FA	0.563442	0.450104	0.646386	0.641435	0.657097	0.624866	0.3662	0.504407	0.434705	0.463979	0.413627	0	0.210275	0.325395	0.147443
2525.18	67	C33 OH	0	0.139321	0.186547	0.195972	0.099256	0.191456	0.111536	0.258432	0.209364	0.0534721	0.224582	0	0	0	0
2492.62	68	Campesterol	0.844323	1.51994	1.43452	1.36645	1.49397	1.28904	0.553855	0.494783	0.585602	0.226356	0.627549	0.900994	0.806697	1.79697	0.602978
1102.33	69	Capric Acid	0	0	0	0	0	0	0	0	0	0	0	0	0	0	0
2426.32	70	Cholesterol	0.504141	0.58441	0.763429	0.54133	0.46255	0.485193	0.161854	0.230175	0.280532	0	0.200981	0	0.260683	0.423759	0.124415
2408.64	71	Cholesterol-like terpene_a	0	0	0	0	0.070539	0.121788	0	0	0.0836488	0	0	0	0.10451	0.405312	0.443633
2453.44	72	Cholesterol-like terpene_b	0.240856	0.233355	0.199418	0.250318	0.577769	0.483795	0.0760152	0.174914	0.145159	0	0.180092	0	0	1.07603	0
1681.28	73	Cyclic alcohol (inositol??)	1.80475	0.142538	0.0839837	2.80488	1.9604	3.44412	1.1889	0.612059	1.64085	0.267052	0.579966	0.58457	0.431876	0.651074	0.423857
1744.27	74	Cyclic alcohol (inositol??)	0	2.62578	1.83688	0.124841	0	0.146427	0	0	0	0	0	0	0	0	0
1468.3	75	D-Pinitol, pentakis(trimethylsilyl) ether	12.3583	11.6179	10.6759	14.5438	8.70278	9.80357	3.87851	2.77436	4.70186	1.68878	4.92748	3.19134	0.391746	6.50719	1.1085
1993.95	76	Dehydroabietic Acid	2.45801	8.09253	1.54075	1.63284	2.72301	2.42962	0.432603	1.35773	0.424877	0.694219	0.760101	1.36566	1.17559	3.22388	1.5129
2170.3	77	Disacharide_a	0	0	0	0.576207	0	0	0	0	0	0	0	0	0	0	0
2194.55	78	Disacharide_b	1.04809	0.883075	0.978906	0.989341	0.886168	0.871178	0.413566	0.456722	0.32605	0.171963	0.258144	0.531859	0.292667	0.510318	0.345734
2239.28	79	Disacharide_c	0	0.176197	0.316872	0.531676	0.305474	0.531279	0	0	0	0	0	0	0	0	0
2245.29	80	Disacharide_d	0	0	0	0	0	0	0	0	0	0	0	0	0	0	0
2251.37	81	Disacharide_e	2.1984	1.07683	2.37218	2.7727	2.20581	3.28438	0	0.537378	0	0	0	1.8401	0	0.14156	0
2254.29	82	Disacharide_f	0	0.524306	0.272372	0	0.40521	0	1.07534	0.0807802	1.09337	0.380217	0.718864	0.29	0	0.094261	0.342748
2257.29	83	Disacharide_g	0	0.524306	0.272372	0	0.40521	0	1.07534	0.0807802	1.09337	0.380217	0.718864	0.29	0	0.094261	0.342748
2272.31	84	Disacharide_h	0	0	0	0	0	0	0	0	0.230226	0	0	0	0	0	0
2278.28	85	Disacharide_i	0	0	0	0.0700235	0.0646827	0.219012	0.0886505	0	0.230226	0	0.110248	0.429309	0	0	0
2344.46	86	Disacharide_j	0	0	0.242045	0	0.2964	0.403032	0	0	0	0	0	0	0	0	0
2329.56	87	Disubstituted alcohol_a	0	0.118393	0.146748	0.0827197	0.233657	0.194644	0	0	0	0	0	0	0.0734653	0	0
2434.82	88	Disubstituted alcohol_b	0.501887	0.415571	0.496456	0.504046	0.542695	0.57805	0.145505	0.178163	0.0896628	0	0.0974815	0	0	0	0
2564.19	89	Disubstituted alcohol_c	0	0.137393	0.123323	0.0933127	0	0.105088	0	0	0	0	0	0	0	0	0
2835.26	90	Disubstituted alcohol_d	0	0.31764	0.544455	0.488004	0.263272	0.404344	0.106333	0	0.188668	0	0	0	0	0	0
1747.84	91	Ferulic acid	0	0	0.126198	0	0	0	0.111875	0.109685	0	0	0	0	0.0916179	0.293249	0
1510.35	92	Fructose 1	5.7676	7.61148	9.21797	22.9826	15.5068	27.8254	23.5953	6.41266	17.9763	9.51571	23.2665	17.8657	0.908065	11.8787	4.67059
1345.3	93	Fucose 1	0.746294	1.62903	0.88482	1.0302	1.10143	1.42557	0	0.417845	0.189805	0	0.55839	1.41372	0	0	0
1531.35	95	Glucose 2	0.56451	2.12257	0.535889	3.0865	1.18528	4.33482	3.40317	3.10436	2.7805	3.26549	4.25427	2.40211	0.289618	1.4589	0.263658
916.16	96	Glycerol	5.43359	5.14093	5.53754	4.76055	4.94455	6.14215	2.94512	2.70738	1.91725	1.59003	2.41742	2.66522	1.26248	7.47944	2.23484
2639.55	97	Glycerol derivative	0.525002	1.10172	1.04561	1.26236	0.980451	1.20697	0.348111	0.155171	0.237274	0.134199	0	0	0	0.268576	0
1951.25	98	Glyceryl-glycoside TMS ether	0.395033	0.256644	0.342305	0.24887	0.29331	0.281113	0	0	0	0	0	0	0	0	0
2281.55	99	Hydrocarbon (C29)	0	0.176963	0	0.107214	0.140923	0.152241	0.0932131	0.0882846	0.0776106	0	0.0974647	0	0	0	0
2044.48	100	Hydrocarbon,=?	0	0	0.0873854	0	0	0	0	0	0	0	0	0	0	0	0
2164.51	101	Hydrocarbon,=?_a	0	0	0	0	0	0	0	0	0	0	0	0	0	0	0
2176.47	102	Hydrocarbon,=?_b	0	0.233614	0.130462	0.239919	0.293928	0.18714	0.0844558	0.119367	0	0	0	0	0	0	0
1354.23		IS-Adonitol	9.465	9.13481	9.0293	8.82084	9.07573	8.65407	10.4727	10.2771	8.80975	14.0938	10.3272	9.97341	9.06557	13.4579	10.6869
883.24		IS-nor-Valine	0	0.152617	0.200623	0.100621	0.0671674	0.0663408	0.237948	0.924644	0.247168	0.95668	0.507315	0.363559	0.94543	1.44331	1.65981
1990.63		IS_1Br_C20	2.57788	2.57528	2.62314	2.5719	2.59152	2.48347	1.89812	2.79306	2.16565	2.33425	2.09292	2.24168	2.9919	3.44263	2.57817
1183.86	106	Isovanillin	0	0	0	0	0	0	0	0	0	0	0	0	0	0	0
940.21	107	L-Isoleucine, 2TMS derivative	0	0	0	0	0	0	0	0	0	0	0	0	0	0	0
1090.2	108	L-Threose 1	0	0	0	0	0	0	0	0	0	0	0	0	0	0	0
1336.53	109	Levoglucosan	0	0	0	0	0	0	0	0	0	0	0	0	0	0	0
1456.41	110	Lyxose	0.298731	0.65432	0.300266	1.41938	0.957898	1.21136	4.23609	0.373327	1.05636	1.41672	1.95536	0.639279	0	0	0
2206.26	111	Maltose	1.44938	1.73331	1.2481	1.33254	1.2835	2.13645	0.755494	0.516952	0	0	0.671107	1.11994	0	0	0
1585.27	112	Mannitol	3.89646	1.32944	0	0.0996603	0	0.10938	0.170882	0	0.129286	39.6035	51.7422	34.1691	0	44.5	11.6407
1540.38	113	Mannose 1	107.472	21.9123	74.7268	104.626	89.1306	115.334	53.1946	80.072	48.5875	36.3549	53.8146	37.1233	23.5257	78.675	27.3099
1561.37	114	Mannose 2	29.0234	47.0384	18.1312	27.961	23.7594	31.5874	12.2045	18.6735	10.808	6.34468	11.5132	6.50564	4.53935	15.4266	4.94147
1967.26	115	Methyl dehydroabietate	0.313452	0.297727	0.359868	0.102014	0.532725	0.181507	0	0.220801	0	0	0.183509	0	0	0.236843	0
1954.38	116	Monoglyceride	0.737382	0.982782	0.926463	0.975364	0.713348	1.05923	0.271657	0.386607	0.54155	0.264636	0.386326	0.487953	0.1913	0.956015	0
2182.51	117	Monoglyceride	0	0	0.0887284	0	0	0	0	0	0	0	0	0	0	0	0
2200.53	118	Monoolein	0	0.555698	0.631292	0.415233	0.460472	0.58877	0.220575	0.403431	0.403472	0.122607	0.325515	0	0.209765	0.49586	0.184542
1678.34	119	Monosacharide	0	0.488563	0.197854	0.122603	0.107958	0.193377	0.05592	0.0914553	0.104238	0.445057	0.747606	0.232336	0.0827834	0.221838	0
1465.41	120	Monosacharide, hexosa_a	0.937817	2.95957	2.69502	4.84533	5.722	4.98718	0	0.658967	0.190224	0	0	0	0	0	0
1477.42	121	Monosacharide, hexosa_b	0	0	0	0	0	0	8.82209	0	0	2.70006	4.10036	1.30464	0	0.351977	0
1483.44	122	Monosacharide, hexosa_c	2.62566	3.8506	2.54431	1.99222	3.84046	4.91989	0.678325	1.25125	2.50873	0	0.30601	0.245119	0	0.347211	0.110491
1615.33	123	Monosacharide, hexosa_d	2.63678	3.34289	2.9752	5.88258	4.45595	4.53237	0	0.36356	0.539	0	0	0	0	0	0
1627.32	124	Monosacharide, hexosa_e	0	0	0	0	0	0	0	0	0	0	0	0	0	0	0
1780.25	125	Monosacharide_a	0	1.54175	1.07773	1.70412	0.881927	0	0.587611	0.836445	0.477459	1.03187	0.918626	0.86321	0.172791	0	0.084269
1786.25	126	Monosacharide_b	0.679481	0.905693	0.517541	0.881298	1.28176	1.74193	0.587611	0.55191	0.836954	0.705876	1.25869	0.455275	0.172791	0	0.084269
1960.22	127	Monosacharide_c	0	0	0	0	0	0	0	0	0	0	0	0	0	0	0
1969.42	128	Monosacharide_d	0.185698	0.279837	0.180105	0.114351	0.435571	0	0	0	0	0	0	0	0.119339	0	0
1903.64	129	Multifunctional, branched compound_a	0	0.0817937	1.02331	0.168911	0.516573	0.12564	0	0	0	0	0	0	0	0	0
1963.49	130	Multifunctional, branched compound_b	0	0.290703	2.09767	0.628672	1.1334	0.464352	0	0	0	0	0	0	0	0	0
2050.38	131	Multifunctional, branched compound_c	0	1.0192	0.578804	0	0.237417	0	0	0	0	0	0	0	0	0	0
2056.77	132	Multifunctional, branched compound_d	0	0	0.162986	0	0	0	0	0	0	0	0	0	0	0	0
2059.38	133	Multifunctional, branched compound_e	0.192052	1.22245	1.55242	1.20881	1.55501	2.97985	0.190998	0	0.125911	0	0	0	0	0	0
2059.44	134	Multifunctional, branched compound_f	0	0	0	0	0	0	0	0	0	0	0	0	0	0	0
2062.51	135	Multifunctional, branched compound_g	0	0	0.240857	0	0	0	0	0	0	0	0	0	0	0	0
1063.5	136	Myrtenoic acid	0	0	0	0	0	0	0	0	0	0	0	0	0	0	0
1729.49	137	N-acetylated monosacharide	0	0	0	0.147342	0	0	0	0.140637	0	0	0	0	0.255647	0.19835	0
1009.32	138	Pelargonic acid	0	0.327519	0.270074	0	0.104253	0.21281	0	0.0971527	0.0655093	0.099181	0.0658438	0	0.10996	0.277368	0
1387.48	139	Phosphoric acid, bis(trimethylsilyl) 2,3-bis[(trimethylsilyl)oxy]propyl ester	0	0	0	0	0	0	0	0	0	0	0	0	0	0	0
1351.24	140	Ribitol	0	0	0	0	0	0	0	0	0	0	0	1.41372	0	0	0
1303.29	141	Ribose	0.603279	1.02449	0.649175	0.645788	0.749226	0.979393	0.250683	0.251891	0.167632	0.283879	0.29036	0	0	0.375163	0
1405.39	142	Sacharide	0	0.416091	0.379919	0.913653	0.317098	1.14228	0	0	0.0720578	0	0	0	0	0	0
1201.29	143	Sacharide, pentosa	0	0.584454	0.311456	0.327297	0	0.323564	0	0	0	0	0	0	0	0	0
2563.78	144	Sacharide_a	0	0	0	0	0	0	0	0	0	0	0	0	0	0	0
2576.16	145	Sacharide_b	0	0	0	0	0	0	0	0	0	0	0	0	0	0	0
2659.85	146	Sacharide_c	1.14291	1.15685	1.98518	2.40035	1.35	3.01551	1.80971	2.18224	1.88191	1.37671	1.45404	0.643727	1.63636	0.320942	0.799272
2798.17	147	Sacharide_d	0	0.0847427	0.274742	0.151426	0.156777	0.176872	0.180463	0.103397	0.226605	0.164747	0.216299	0	0	0.139457	0.333768
1438.47	148	Shikimic acid	0	0	0	0	0	0	0.123142	0	0.110498	0.107696	0.345857	0	0	0	0
916.29	149	Silanol, trimethyl-, phosphate (3:1)	1.29547	1.31422	1.0354	0.819318	0.932702	1.45366	0.334075	0.814779	0.374557	0.520041	0.417004	0.480103	0.0824981	1.2081	0.672297
2209.31	150	Sophorose	0	0	0.280053	0	0	0	2.92945	5.48808	2.96629	0.604626	2.52792	0	0	0	0
2218.28	151	Sophorose 1	7.48234	11.6668	6.71544	9.38143	7.14869	7.65062	0.702827	1.27346	0.775973	0	0.654766	3.02952	2.15182	1.27473	1.05838
2230.28	152	Sophorose 2	1.54388	2.68038	1.22358	1.82337	1.27917	2.8704	0	0	0	3.12381	0	0.749274	0.413304	0	0.060934
1576.28	153	Sorbitol	0	0	3.52833	1.91311	2.45198	6.18654	34.3853	14.373	22.1954	0	0	0	2.84724	0	0
1519.36	154	Sorbose 2	4.48274	6.22774	6.88682	17.4919	11.3205	21.2644	18.599	4.53722	13.2496	6.5751	17.4939	12.3986	0.694331	7.94682	3.31182
2510.68	155	Stigmasterol	0.61062	0.933833	0.813896	0.904868	0.857984	0.744956	0.236629	0.255574	0.264521	0.139472	0.314337	0.254182	0.363381	0.458693	0.291553
1330.6	156	Suberic acid	0	0	0.0829543	0	0	0	0	0	0	0	0	0	0	0	0
2131.24	157	Sucrose	0	0	0.200723	0.174659	0.110871	0.618564	1.3874	0.70697	0.861717	2.17196	1.86714	1.07308	0.570878	18.4254	4.20427
1144.59	158	Terpene_a	0.549413	0.635474	0.297707	0.440084	0.364574	0.4156	0.0637487	0	0	0	0	0	0	0	0
1486.6	159	Terpene_b	0	0	0	0	0	0	0	0	0.0948293	0	0	0	0	0	0
1939.79	160	Terpene_c	0.283621	1.47183	0.180656	0.196491	0.273321	0.379555	0	0.21251	0	0.1895	0.105295	0	0	0.253662	0
1951.79	161	Terpene_d	0.607165	3.20225	0.375297	0.378212	0.652937	0.562039	0	0.389644	0	0	0.0471804	0.237828	0.155871	0.320514	0.0783594
1963.82	162	Terpene_e	0.373179	2.41801	0.539092	0.112829	0.472889	0.436248	0.0783449	0.270162	0.0670614	0.131383	0.110016	0.200361	0.204042	0.557241	0.606001
1975.45	163	Terpene_e	0	0	0.116747	0.265195	0	0	0	0	0	0	0	0	0	0	0
1981.44	164	Terpene_f	0.270455	0.470912	0.754436	0.231976	0.203795	0.363485	0	0.185359	0	0	0.0445094	0	0	0	0
1987.44	165	Terpene_g	0	0	0.158015	0	0	0	0	0	0	0	0	0	0	0	0
2213.24	166	Terpene_h	0	1.33639	0.198991	0	0.256342	0.367021	0.12535	0.257617	0	0	0	0	0	0	0
2239.75	167	Terpene_i	0	0	0.208789	0	0	0	0	0	0	0	0	0	0	0	0
2583.47	168	Terpene_j	3.09486	3.70147	4.4025	5.81779	6.77278	4.27484	3.14163	1.41151	3.52838	1.3299	3.75776	2.2136	0.244107	2.38697	1.29203
2592.42	169	Terpene_k	0	0.453103	0.338854	0.484556	0.524333	0.415464	0	0	0.191112	0	0	0	0.551057	0	0
2194.31	170	Trehalose	57.4864	34.5812	50.2371	52.1525	45.0445	63.1634	49.0206	59.1014	61.4895	51.2705	54.0724	84.8265	58.9719	71.8479	53.0657
2314.63	171	Trimethylsilyl 22-(trimethylsilyloxy)docosanoate	2.37594	2.44258	2.94166	3.07959	2.63881	3.12629	0.834022	0.503271	0.733233	0.311778	0.437889	0.851193	0.397368	0.438683	0.358902
2419.92	172	Trimethylsilyl 24-(trimethylsilyloxy)tetracosanoate	2.18438	2.49343	2.06729	2.5657	2.70831	2.33961	0.649129	0.465567	0.846323	0.376193	0.201782	0.437921	0.442283	0.30003	0.164263
2074.42	173	Unknown	0	0	0.344136	0	0	0	0	0	0	0	0	0	0	0	0
1459.67	174	Unknown_a	0	0.355621	0.107061	0.130256	0.167369	0.21927	0	0	0	0	0	0	0	0	0
2008.42	175	Unknown_a1	0	0.601621	0.629858	0.407011	0.410329	0.176409	0	0	0	0	0	0	0	0	0
2020.64	176	Unknown_b	0	0.126655	0.426027	0.132043	0.0880989	0.0746903	0	0	0	0	0	0	0	0	0
2263.49	177	Unknown_c	0	0	0.0646996	0.0799357	0	0.0916526	0.112858	0.117243	0.174068	0	0.187711	0	0	0	0
2311.57	178	Unknown_d	0.379474	0.575936	0.520511	0.389763	0.442279	0.515989	0.458532	0.789683	0.557413	0.162664	0.512808	0.873095	0.253134	0.386067	0.33678
2359.7	179	Unknown_e	0	0	0	0	0	0	0	0	0	0	0	0	0	0	0
2362.68	180	Unknown_f	0	0	0	0	0	0	0	0	0.261856	0	0	0	0	0	0
985.43	181	Uracil	0	0	0	0	0	0	0	0	0	0	0	0	0	0	0
2023.72	182	Uridine	0	0	0	0	0	0	0	0	0.16021	0	0	0	0	0	0
1402.83	183	Vanilic acid	0	0.113029	0	0	0	0	0.077178	0	0.104247	0	0	0	0.190076	0	0
1273.29	184	Xylose 1	0	0	0	0	0	0	0	0	0	0	0	0	0	0	0
1279.29	185	Xylose 2	0	0	0	0	0	0	0	0	0.111013	0	0	0	0	0	0
1288.28	186	Xylose or Lyxose	0.275704	0.633469	0.235004	0.396677	0.49411	0.438755	0.332592	0.663854	0.279241	0.632424	0.669794	0.501318	0	0.558458	0.186598
2296.73	187	Substituted linear hydrocarbon	0.316254	0.145153	0.20028	0.197343	0.15762	0.206624	0.0585973	0.0914095	0	0.0517435	0	0	0	0	0
