# Supplementary material for: Impact of 30 years precipitation regime differences on forest soil physiology and microbial assemblages
Source: Frontiers journal article supplement (doi:10.3389/ffgc.2023.1142979), 2023-06-13
Supplement: Table_3.XLS [file Table_3.XLS]

## Sheet: Sheet1
#Sample_name	Raw_PEreads	Combined_reads	Uncombined_reads	Percent_combined(%)	Combined_base(bp)	Min_len(bp)	Max_len(bp)	Avg_len(bp)	Qualified_cleanreads	Nochimera	Base(nt)	Q20	Q30	GC%	Effective%
L01	147788	138652	9136	93.82	48211880	47	437	348	137060	117706	41181168	98.25	94.54	43.97	79.65
L02	134494	125760	8734	93.51	42644923	47	438	339	124094	97596	33354042	98.16	94.4	47.87	72.57
L03	148009	140038	7971	94.61	47016485	47	438	336	138792	122661	41362355	98.34	94.86	47.04	82.87
L04	136353	128991	7362	94.6	43350477	23	438	336	128197	107643	36494396	98.27	94.69	50.24	78.94
L05	147678	140458	7220	95.11	45666574	43	438	325	139354	112916	37125101	98.35	94.97	49.37	76.46
L06	145675	139586	6089	95.82	44210268	42	438	317	138784	101655	32314649	98.38	95.22	51.35	69.78
L07	130362	120156	10206	92.17	42597438	47	438	355	118767	105089	37620539	98.03	93.97	50.71	80.61
L08	142594	133488	9106	93.61	44970804	48	438	337	116548	100271	34693042	98.3	94.71	49.91	70.32
L09	131442	124375	7067	94.62	39374958	42	438	317	102434	89633	29133741	98.37	95.08	51.5	68.19
P01	135539	128963	6576	95.15	45684897	48	438	354	125413	113892	40685087	98.2	94.32	49.63	84.03
P02	103120	97434	5686	94.49	33921675	39	438	348	96765	84542	29558459	98.22	94.43	46.02	81.98
P03	125048	118722	6326	94.94	41772148	52	438	352	117789	105705	37187334	98.22	94.38	43.83	84.53
P04	94649	89190	5459	94.23	31867902	48	438	357	83878	71759	26046905	98.02	93.84	45.44	75.82
P05	79350	74788	4562	94.25	27341088	48	438	366	74063	64674	23807931	98.08	93.97	43.6	81.5
P06	129938	124748	5190	96.01	42289642	48	438	339	124007	104786	35815139	98.32	94.74	49.15	80.64
